# Supplementary material
Source: PubMed Central journal article supplement (PMC5081126)
Supplement: 13311_2016_471_MOESM1_ESM.pdf [file 13311_2016_471_MOESM1_ESM.pdf]

## **ICMJE Form for Disclosure of Potential Conflicts of Interest**

---

## **ICMJE Form for Disclosure of Potential Conflicts of Interest**

---

## **ICMJE Form for Disclosure of Potential Conflicts of Interest**

---
